# Supplementary material
Source: MDPI journal article supplement (https://www.mdpi.com/2673-9992/14/1/9)
Supplement: s1 [file s1]

# In vitro evaluation of rare earth-doped phosphor nanoparticles to assess their anti-tumoral efficiency on lung cancer cells

Miruna S. Stan \*, Ionela C. Voinea and Sorina N. Voicu

Department of Molecular Biology and Biochemistry, Faculty of Biology, University of Bucharest, Romania. \*Correspondence: miruna.stan@bio.unibuc.ro

**AIM.** Rare earth-doped nanoparticles have been investigated for their use in disease diagnosis, drug delivery, tumor therapy and bioimaging. In this context, we selected rare earth-doped phosphor nanoparticles (**BaSO<sub>4</sub>:Eu phosphor nanoparticles**), commercially available by Merck, to evaluate their antitumoral efficiency for prospective therapeutic applications, as no study was previously performed.

**METHODOLOGY.** Lung carcinoma epithelial cells (A549 cell line) were incubated with these barite (BaSO<sub>4</sub>) nano-phosphors up to 72 hours.

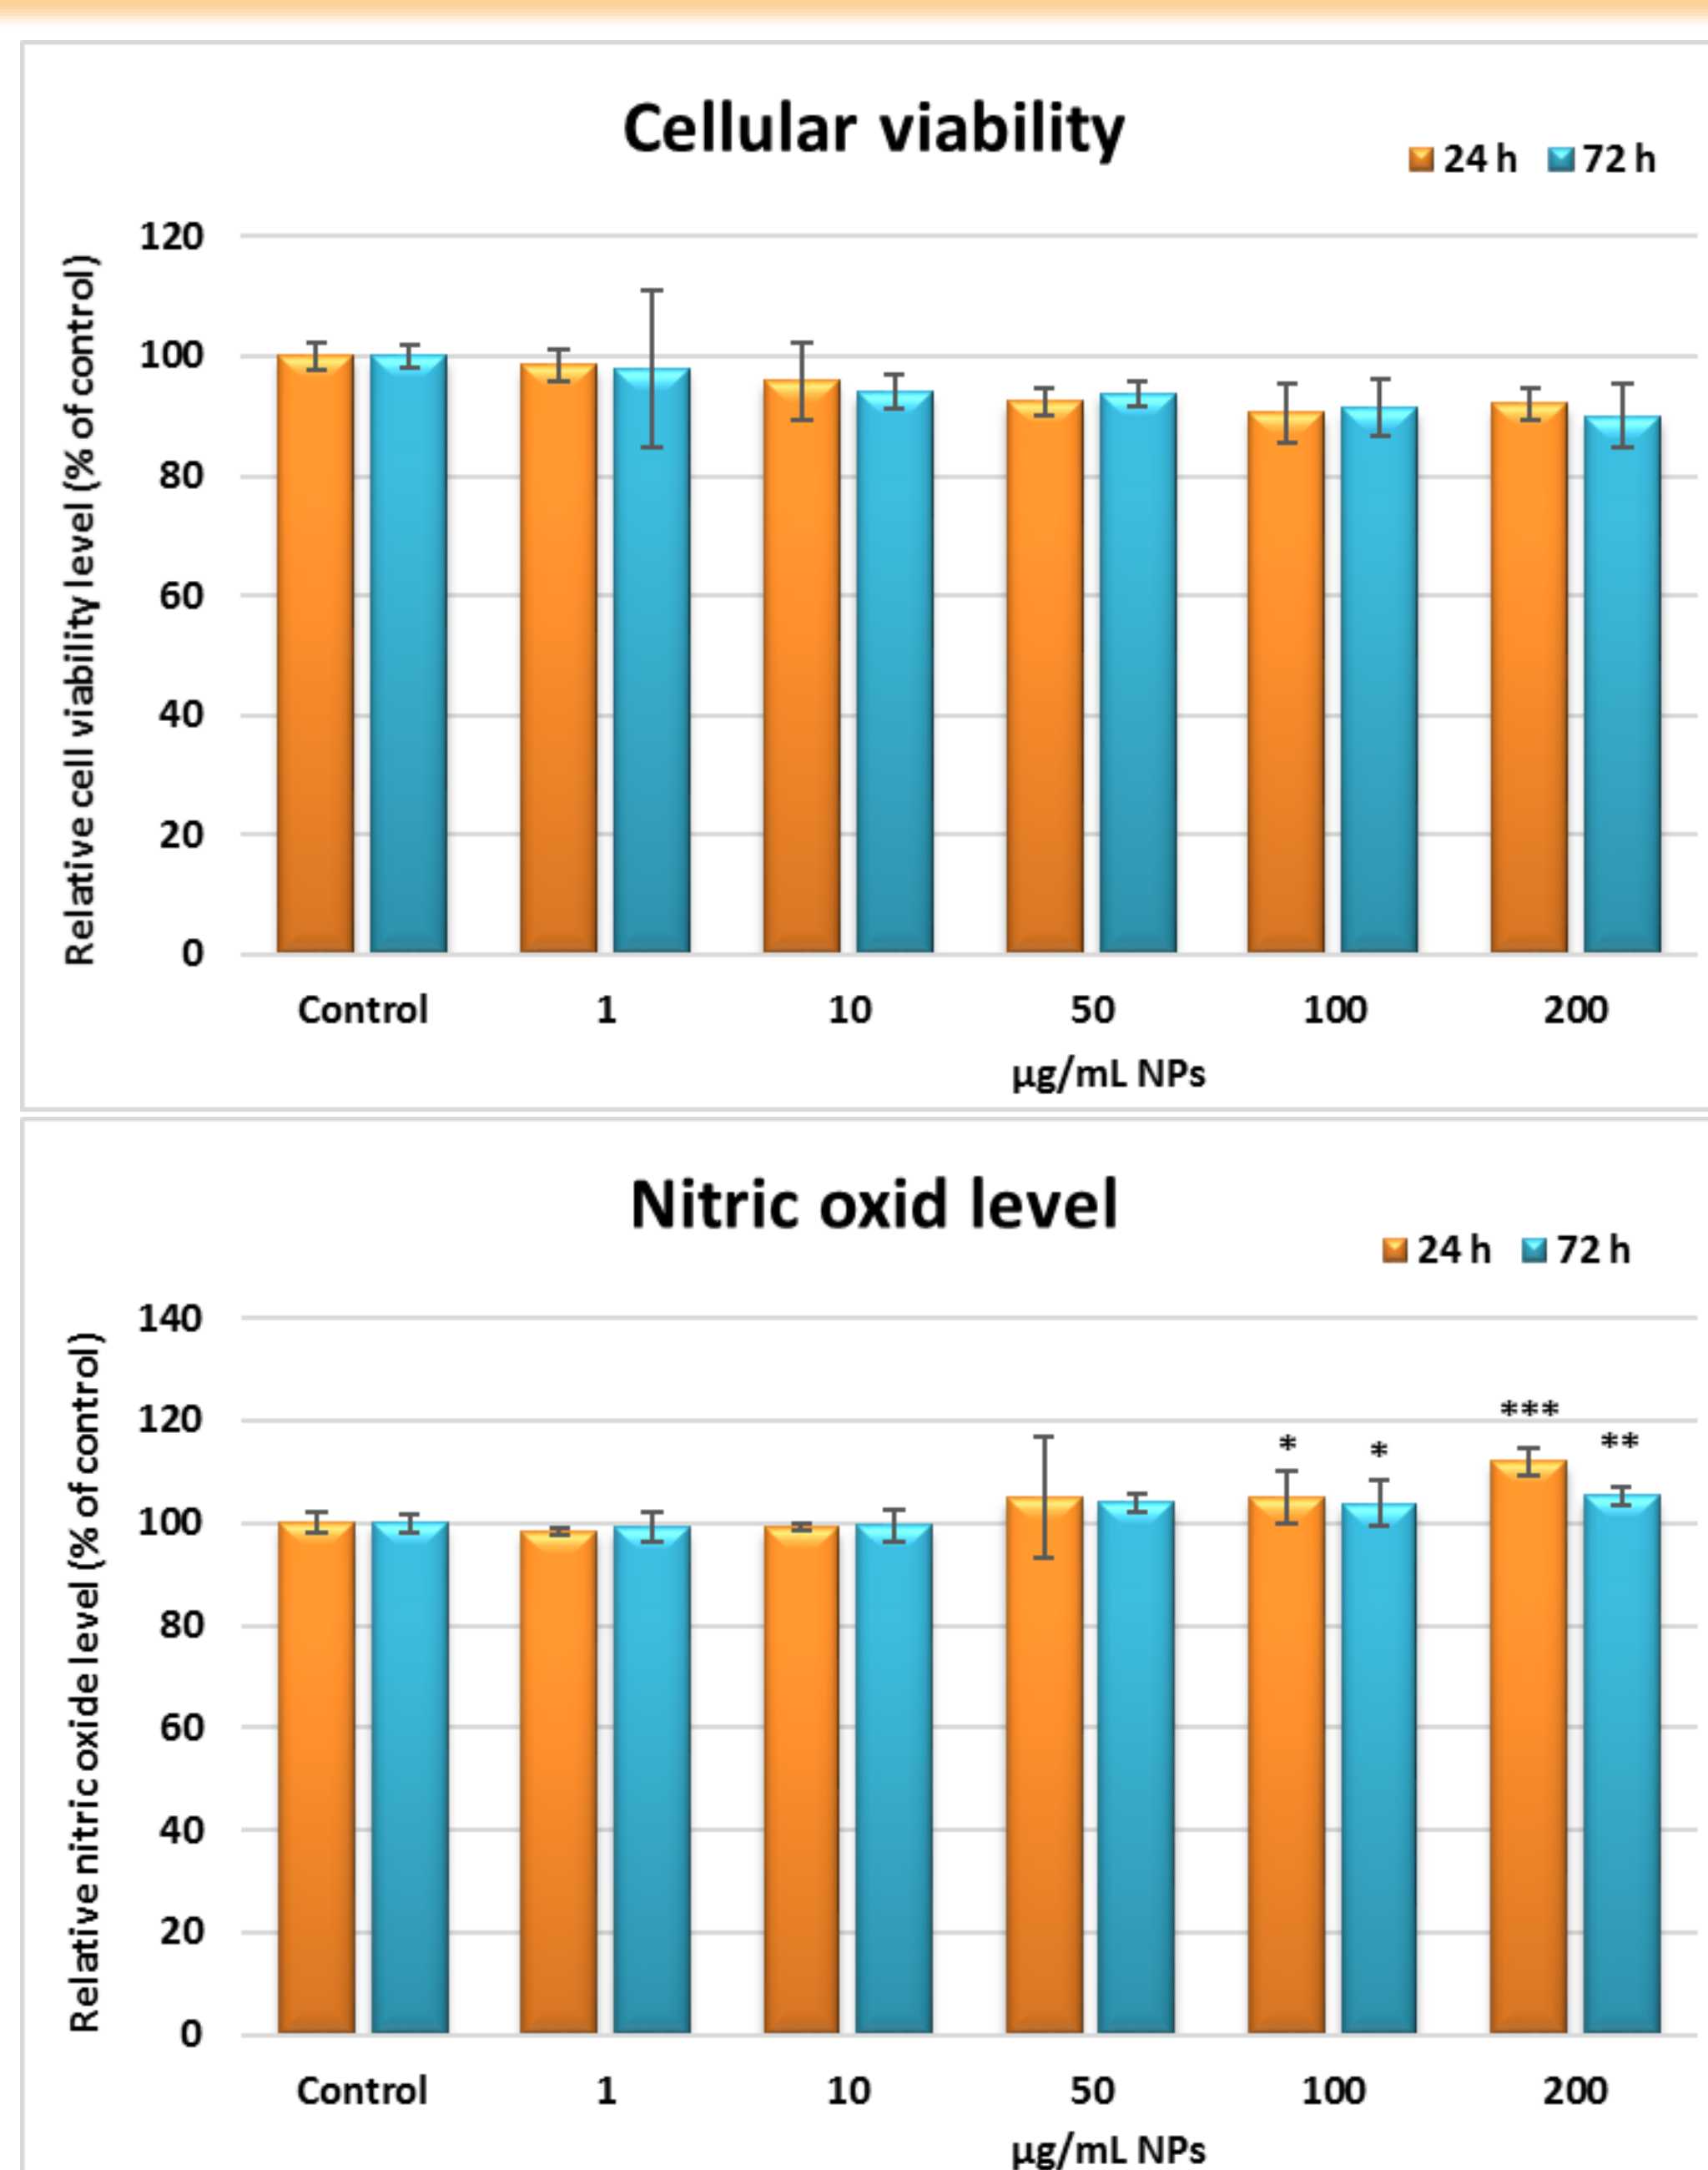

**CONCLUSION.** Our investigation revealed no significant anti-proliferative properties of the BaSO<sub>4</sub>:Eu phosphor nanoparticles on lung tumor cells, but further investigations related to their cytotoxicity should be performed for a better characterization in a biological environment.

**ACKNOWLEDGEMENTS.** This research was funded by UEFISCDI, grant number PN-III-P1-1\_1-TE-2021-1375 (81TE/2022).

## RESULTS.

- The highest concentration tested (200 µg/mL NPs) decreased the number of viable cells only by 10% from control as measured by **MTT test**.
- This result was also confirmed by **double staining of viable and dead cells** with calcein AM and ethidium homodimer, respectively.
- In addition, **the level of nitric oxide** released by cells in the media after the incubation with the NPs increased with 10% above control, showing that no major inflammation was induced, even in the presence of high concentrations of particles.
- However, an increased accumulation of lysosomes was noticed by **LysoTracker Green DND-26** in a time- and dose-dependent manner. This finding could suggest the uptake of Eu-doped barite particles in these acidic organelles in order to be eliminated further by the cells.

## Lysosomes staining

## Live&dead staining

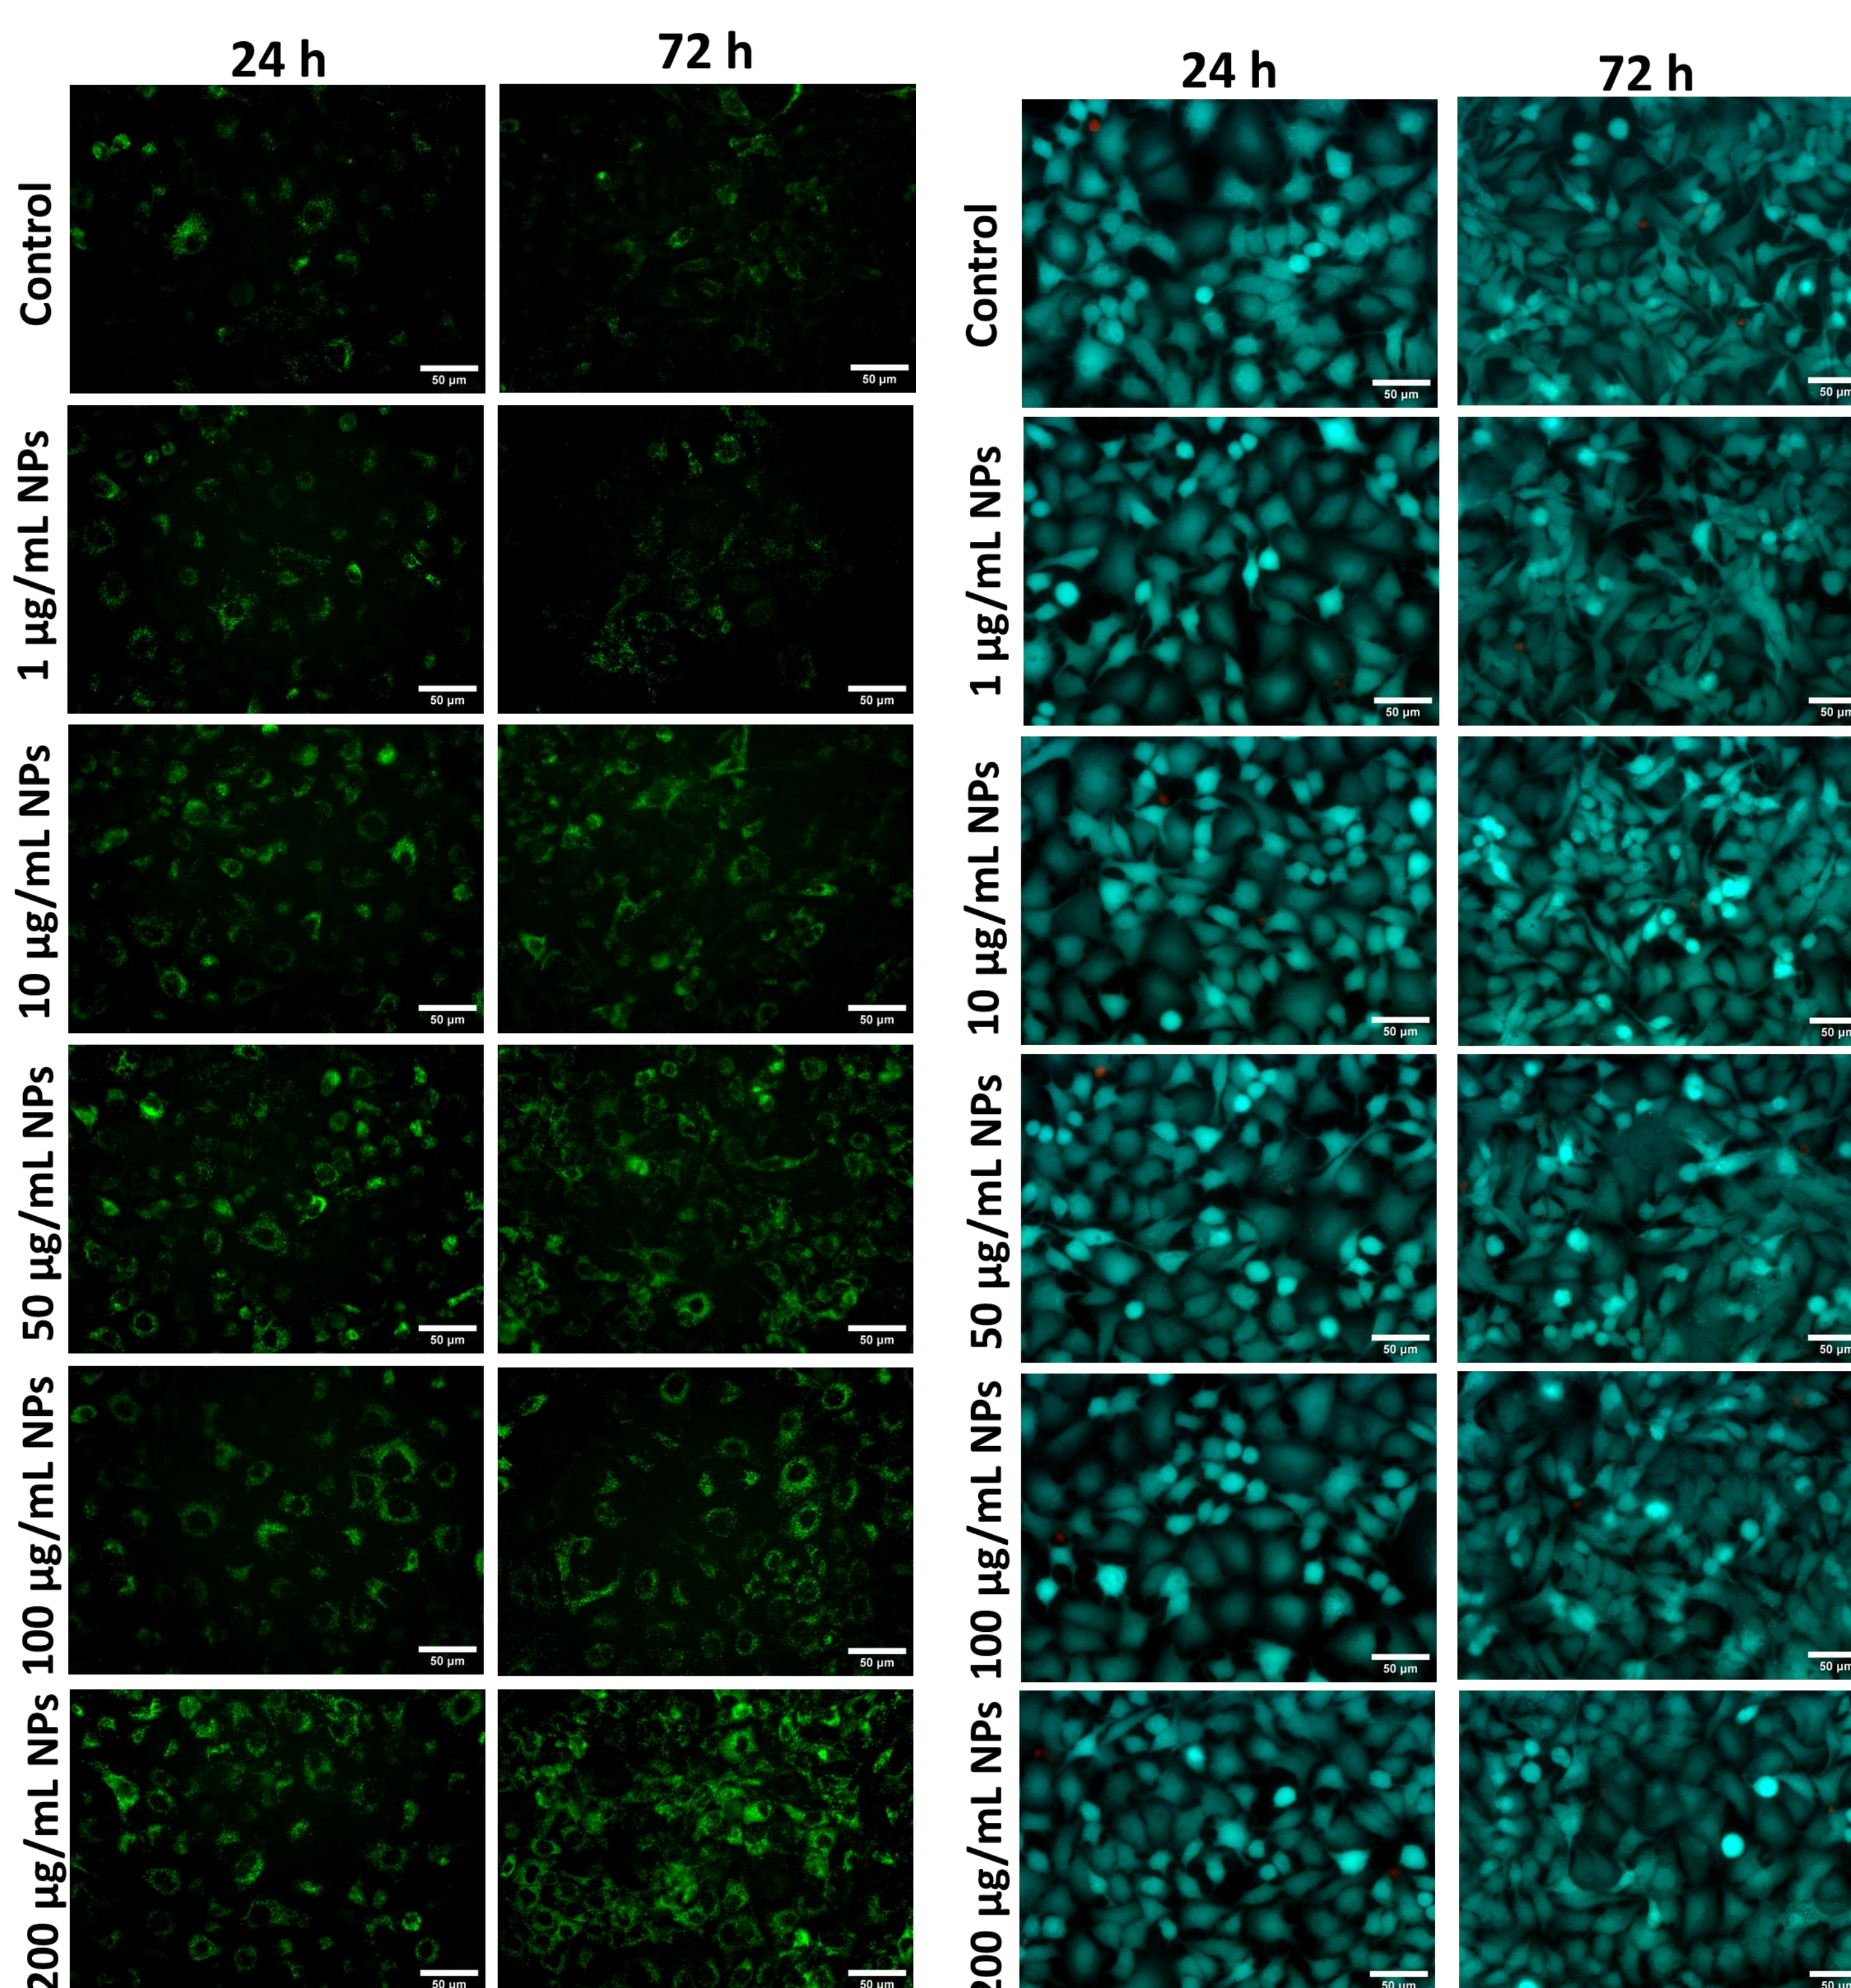

ECMC  
2022

The 8th International Electronic  
Conference on Medicinal Chemistry  
01-30 NOVEMBER 2022 | ONLINE
